# Supplementary material for: Alginic acid/graphene oxide hydrogel film coated functional cotton fabric for controlled release of matrine and oxymatrine
Source: Royal Society of Chemistry journal article supplement (doi:10.1039/c6ra15543j), 2016-01-01
Supplement: c6ra15543j1.pdf [file c6ra15543j1.pdf]

# **Alginate acid/graphene oxide hydrogel film coated functional cotton fabric for controlled release of matrine and oxymatrine**

Lu Gan <sup>a\*</sup>, Lijie Xu <sup>b</sup>, Zhepeng Pan <sup>a</sup>, Fuyuan Jiang <sup>c</sup> and Songmin Shang <sup>d</sup>

<sup>a</sup> *College of Materials Science and Engineering, Nanjing Forestry University, Nanjing, 210037, Jiangsu, People's Republic of China.*

<sup>b</sup> *College of Biology and Environment, Nanjing Forestry University, Nanjing, 210037, Jiangsu, People's Republic of China.*

<sup>c</sup> *Beijing Yonge Water Biological Technology Co., Ltd, Beijing, P.R. China.*

<sup>d</sup> *Institute of Textiles and Clothing, The Hong Kong Polytechnic University, Hong Kong.*

## **Supporting Information**

Figure S1. Chemical structure and HPLC peak of the matrine and oxymatrine

Figure S2. Digital image of CF, AG0-CF and AG0.5-CF

Figure S3. Swelling properties of the AG0, AG0.5 and AG1.0 hydrogels

Table. S1. Cumulative Drug Release rate at different temperature

## Matrine

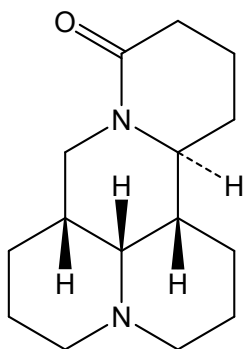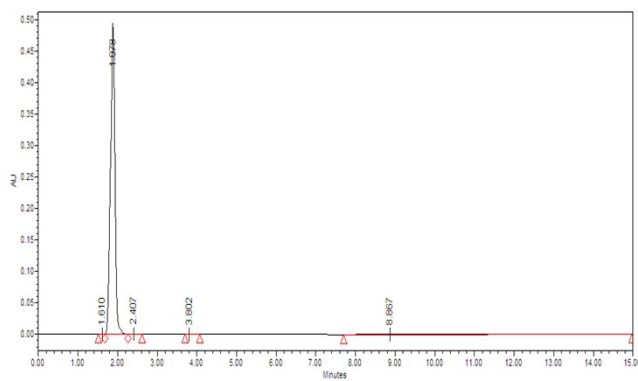

## Oxymatrine

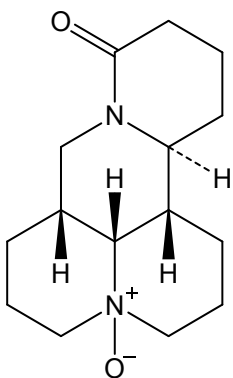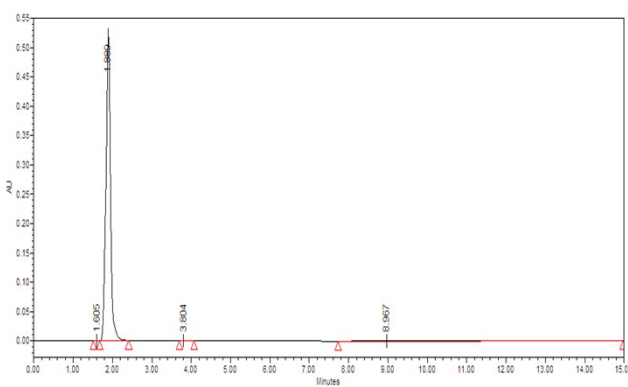

**Fig. S1.** Chemical structure and HPLC peak of matrine and oxymatrine

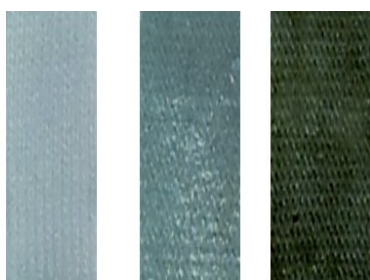

**Fig. S2.** Digital image of CF, AG0-CF and AG0.5-CF

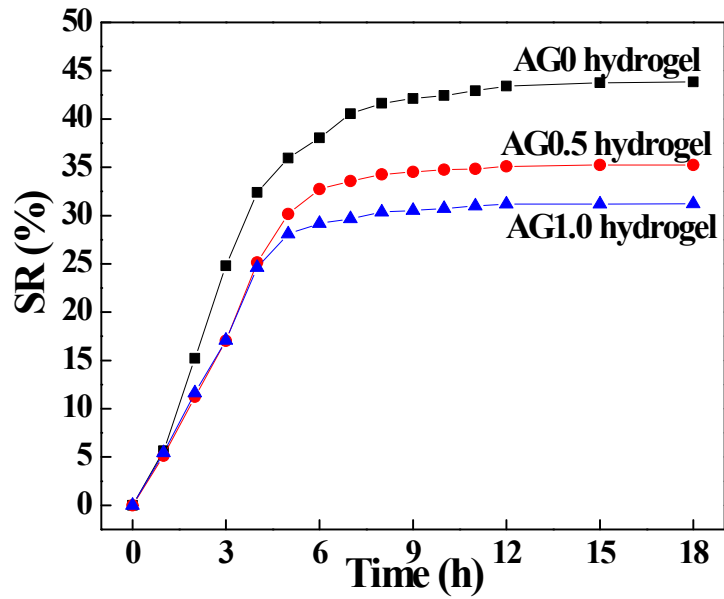

Fig. S3. The swelling properties of AG0, AG0.5 and AG1.0.

Table. S1. Cumulative Drug Release rate at different temperature

| Sample Name | Matrine Release Rate (%) |       |       | Oxymatrine Release Rate (%) |       |       |
|-------------|--------------------------|-------|-------|-----------------------------|-------|-------|
|             | 25 °C                    | 37 °C | 60 °C | 25 °C                       | 37 °C | 60 °C |
| CF          | 95.5                     | 98.4  | 98.4  | 97.4                        | 97.0  | 98.2  |
| AG0-CF      | 85.2                     | 93.8  | 95.5  | 79.3                        | 89.1  | 94.3  |
| AG0.5-CF    | 53.1                     | 72.9  | 93.4  | 47.4                        | 67.8  | 90.6  |
| AG1.0-CF    | 46.8                     | 68.5  | 89.9  | 41.2                        | 59.2  | 88.1  |
